# Supplementary material
Source: ML conference proceedings conference paper supplement (https://openaccess.thecvf.com/content/CVPR2023/html/Han_Multiscale_Tensor_Decomposition_CVPR_2023_paper.html)
Supplement: Supplementary file 1 [file Han_Multiscale_Tensor_Decomposition_CVPR_2023_supplemental.pdf]

# Multiscale Tensor Decomposition and Rendering Equation Encoding for View Synthesis Supplemental Material

Kang Han  
James Cook University  
kang.han@my.jcu.edu.au

Wei Xiang  
La Trobe University  
w.xiang@latrobe.edu.au

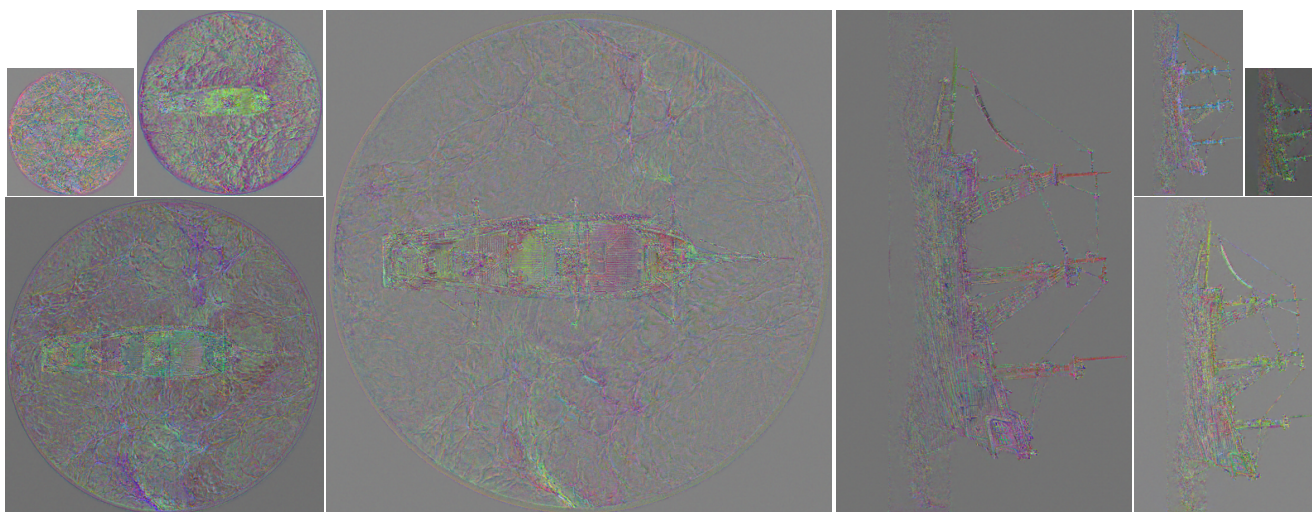

Figure 1. Visualization of plane feature maps of different resolutions on the *ship* scene from the NeRF synthetic dataset. Coarse scene information is represented at low resolutions, while fine details are of high-resolution representations.

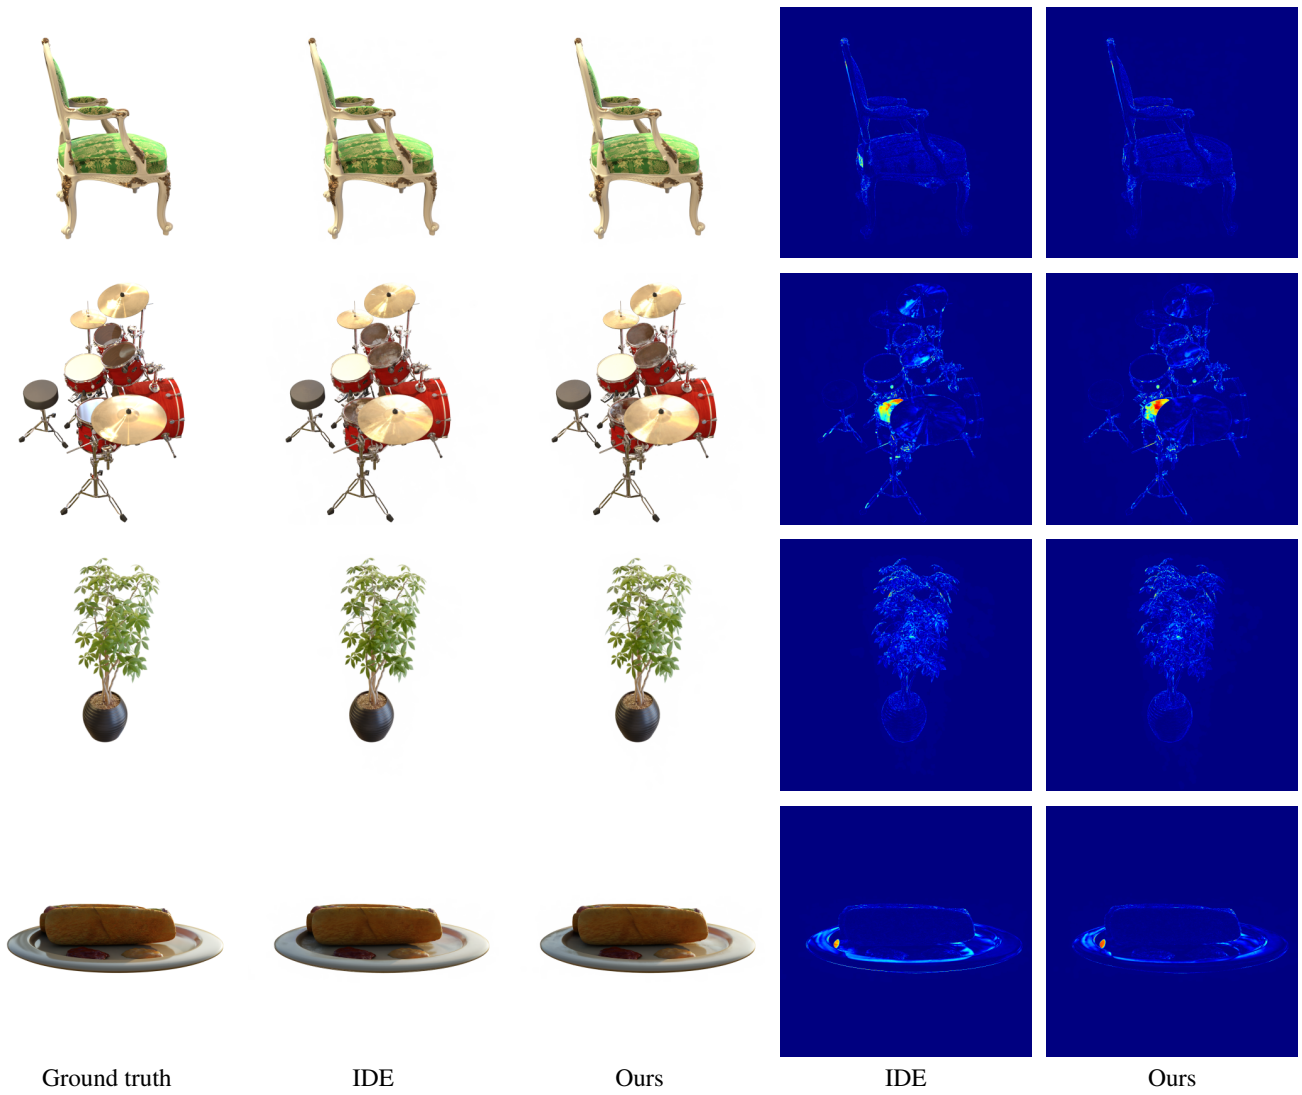

Figure 2. Visual comparison of two methods in modeling view-dependent effects. IDE is the integrated directional encoding (IDE) proposed in Ref-NeRF, while our results are from the proposed rendering equation encoding. For fair comparison, all components are fixed except for the methods used to model view-dependent effects. From top to bottom: *chair*, *drums*, *ficus* and *hotdog*.

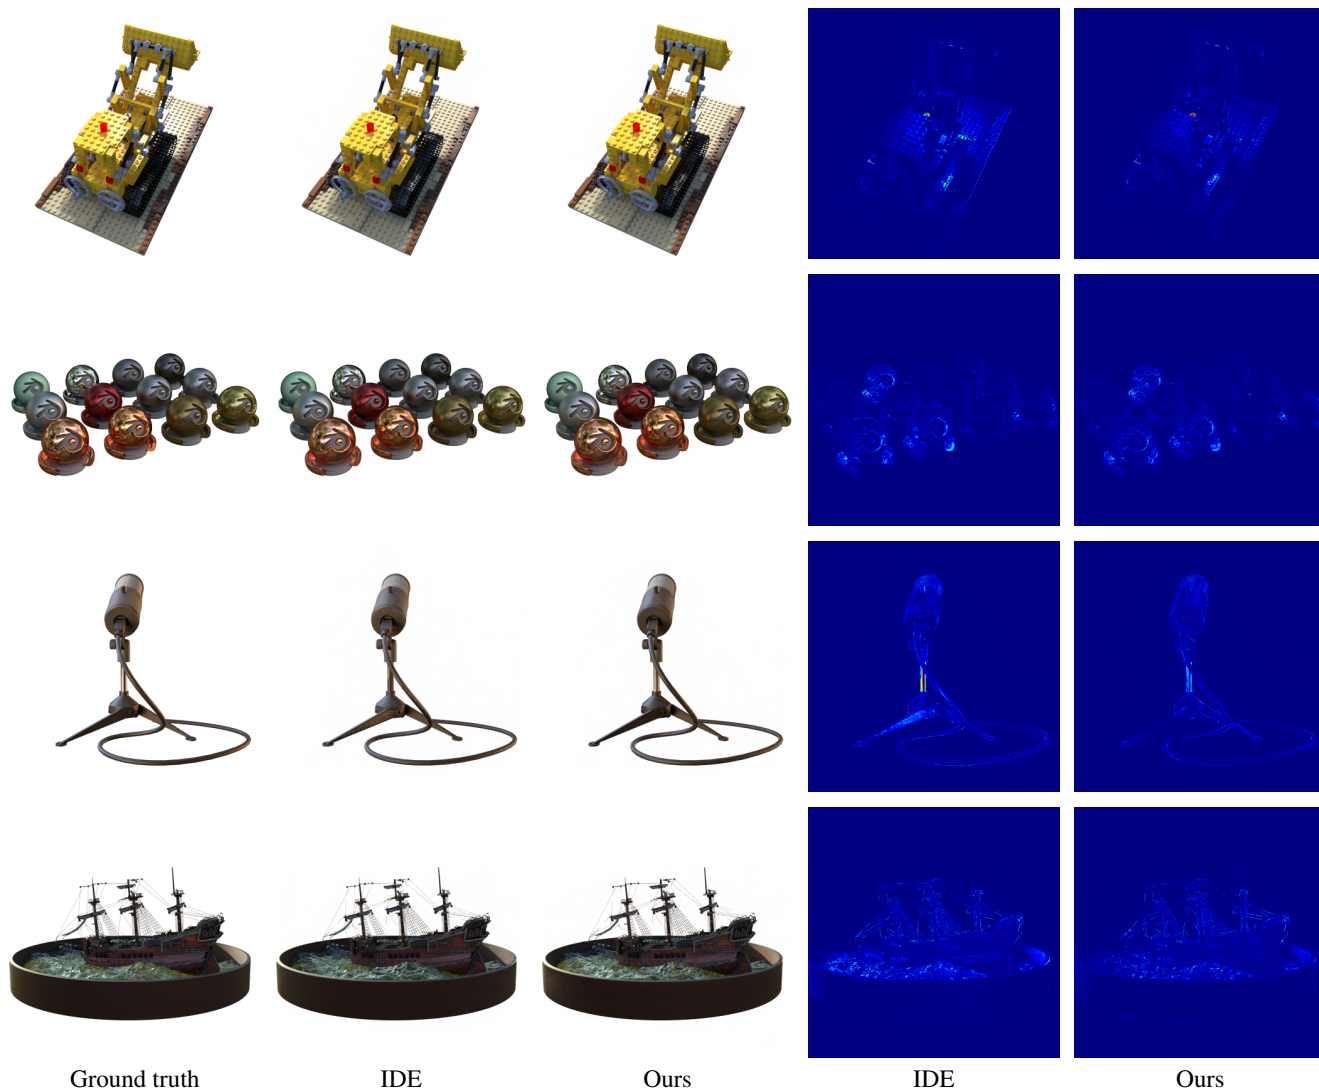

Figure 3. Visual comparison of two methods in modeling view-dependent effects. From top to bottom: *lego*, *materials*, *mic* and *ship*.
